# Supplementary material for: Greenhouse gas and energy fluxes in a boreal peatland forest after clearcutting
Source: Copernicus journal article supplement (doi:10.5194/bg-2018-473), 2018-11-19
Supplement: Supplementary file 1 [file bg-2018-473-supplement.pdf]

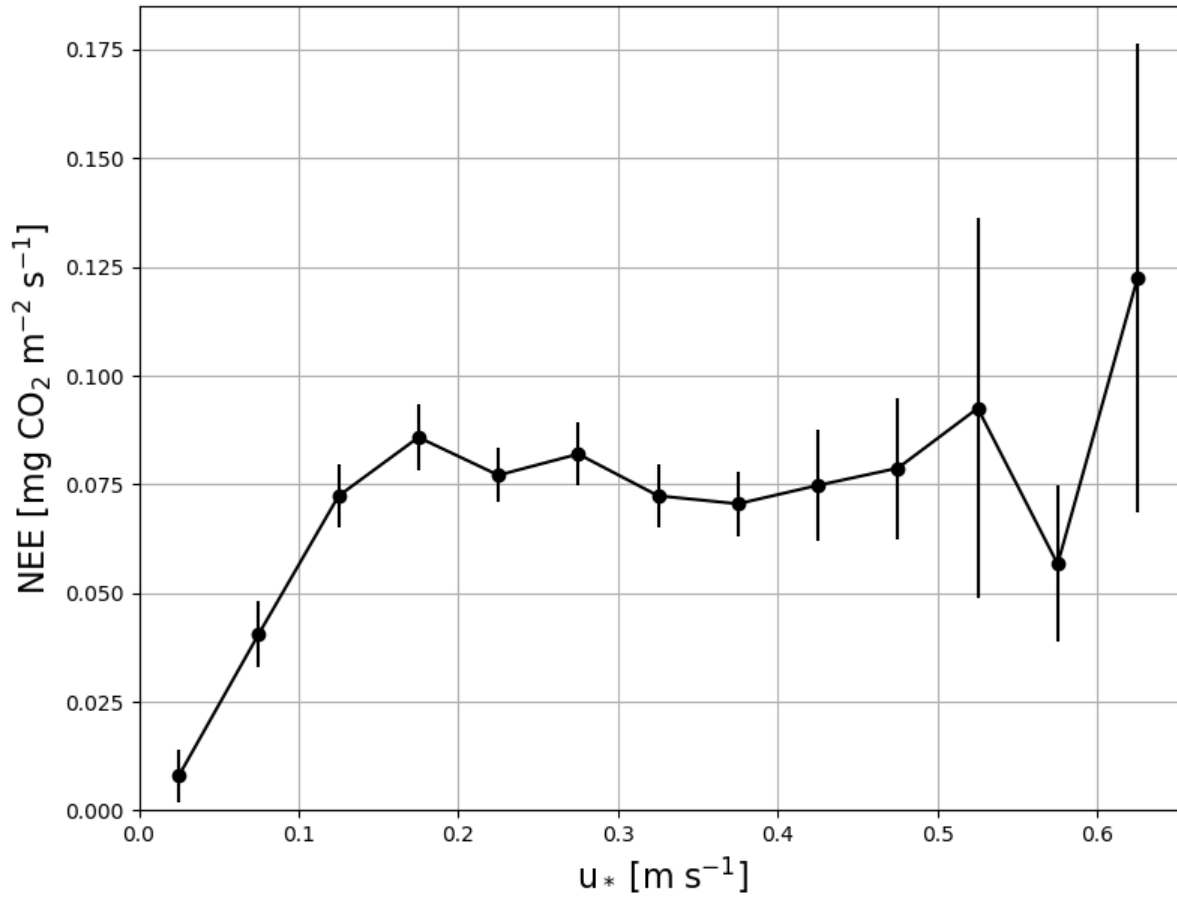

**Figure S1.** Average night-time ( $\text{PPFD} < 20 \mu\text{mol m}^{-2} \text{s}^{-1}$ )  $\text{CO}_2$  flux ( $\pm 95\%$  confidence interval) in the whole measurement period (4/2016 – 9/2017) as a function of friction velocity. The data were grouped into  $u_*$  bins of  $0.05 \text{ m s}^{-1}$ . The  $u_*$  limit below which the data were rejected for further analysis was set to  $0.125 \text{ m s}^{-1}$

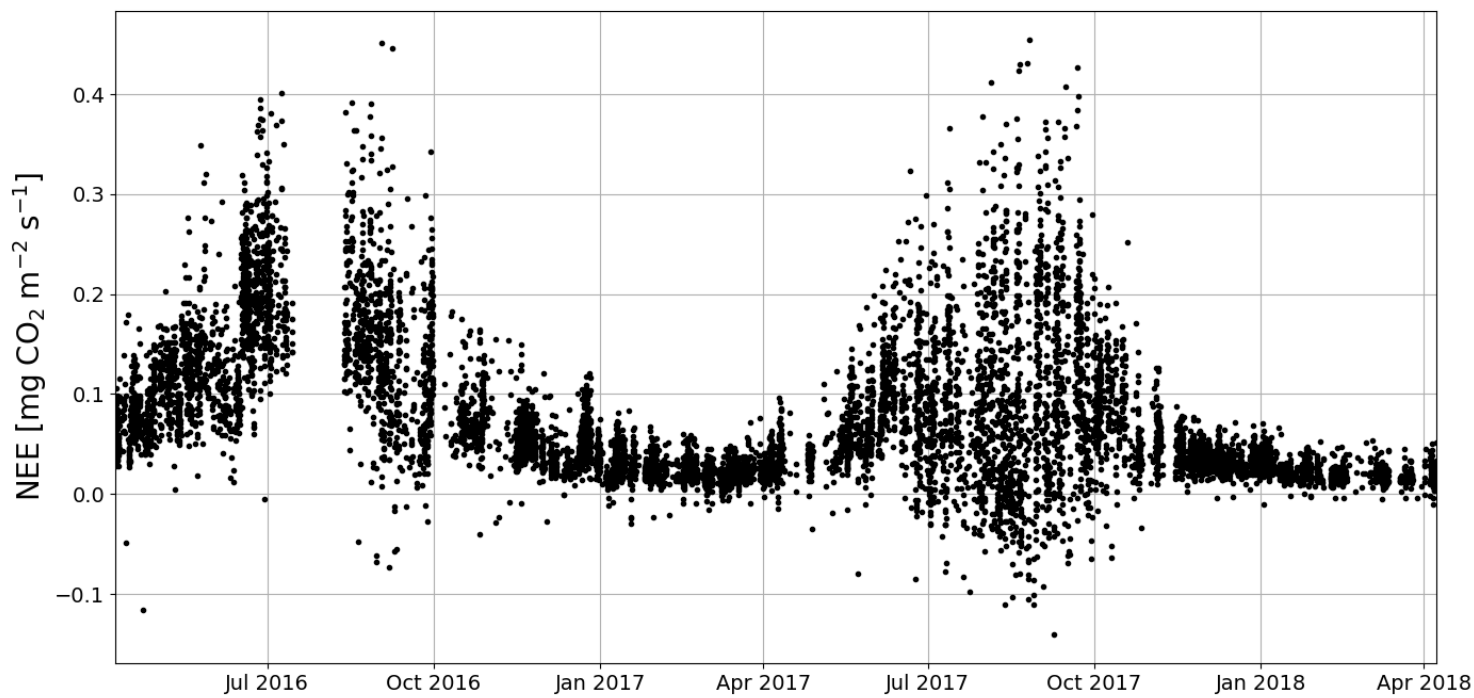

**Figure S2. Time series of the accepted half-hourly measurements of NEE in April 2016 – April 2018.**

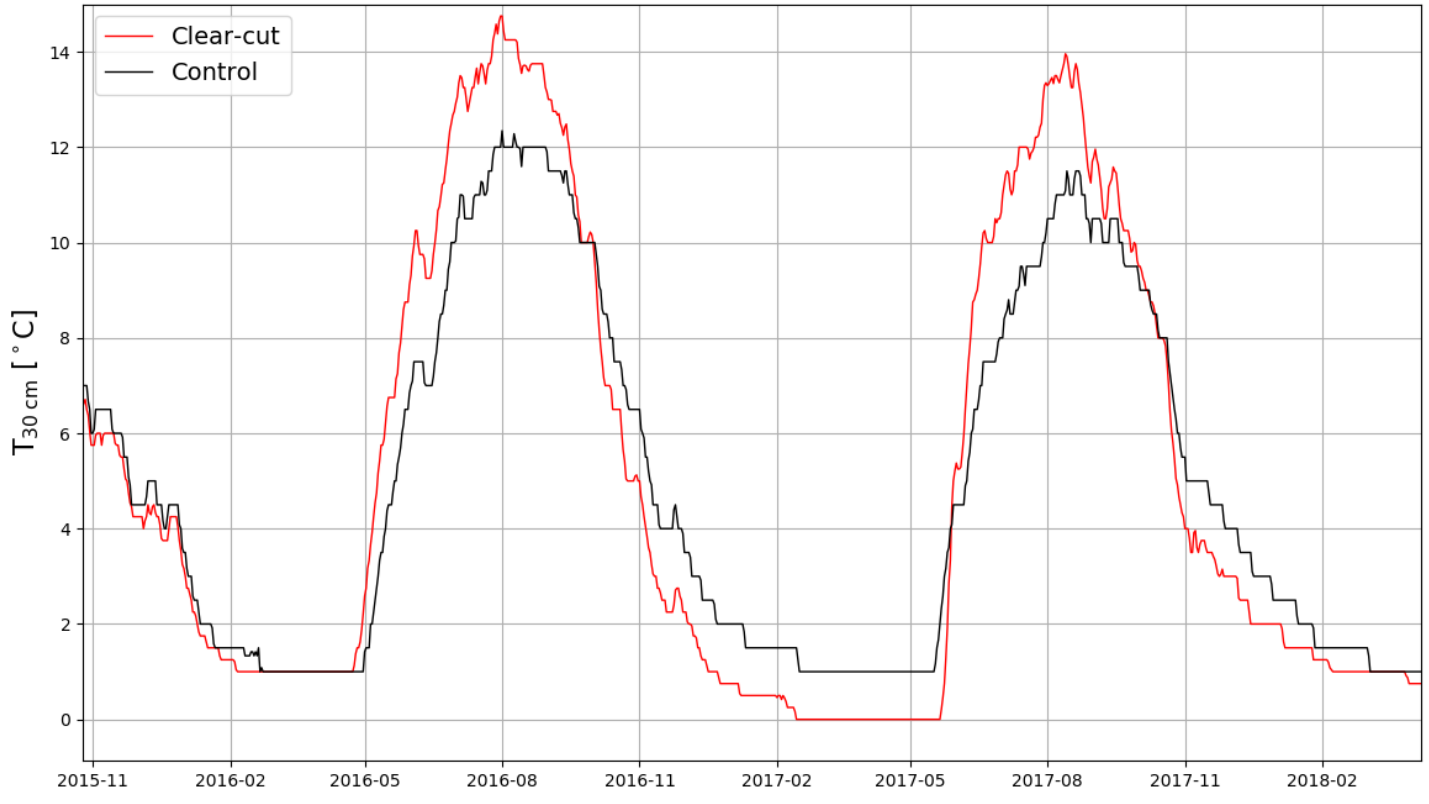

**Figure S3. Daily mean soil temperatures at 30 cm depth measured at the clear-cut (red) and the control (black) treatments.**

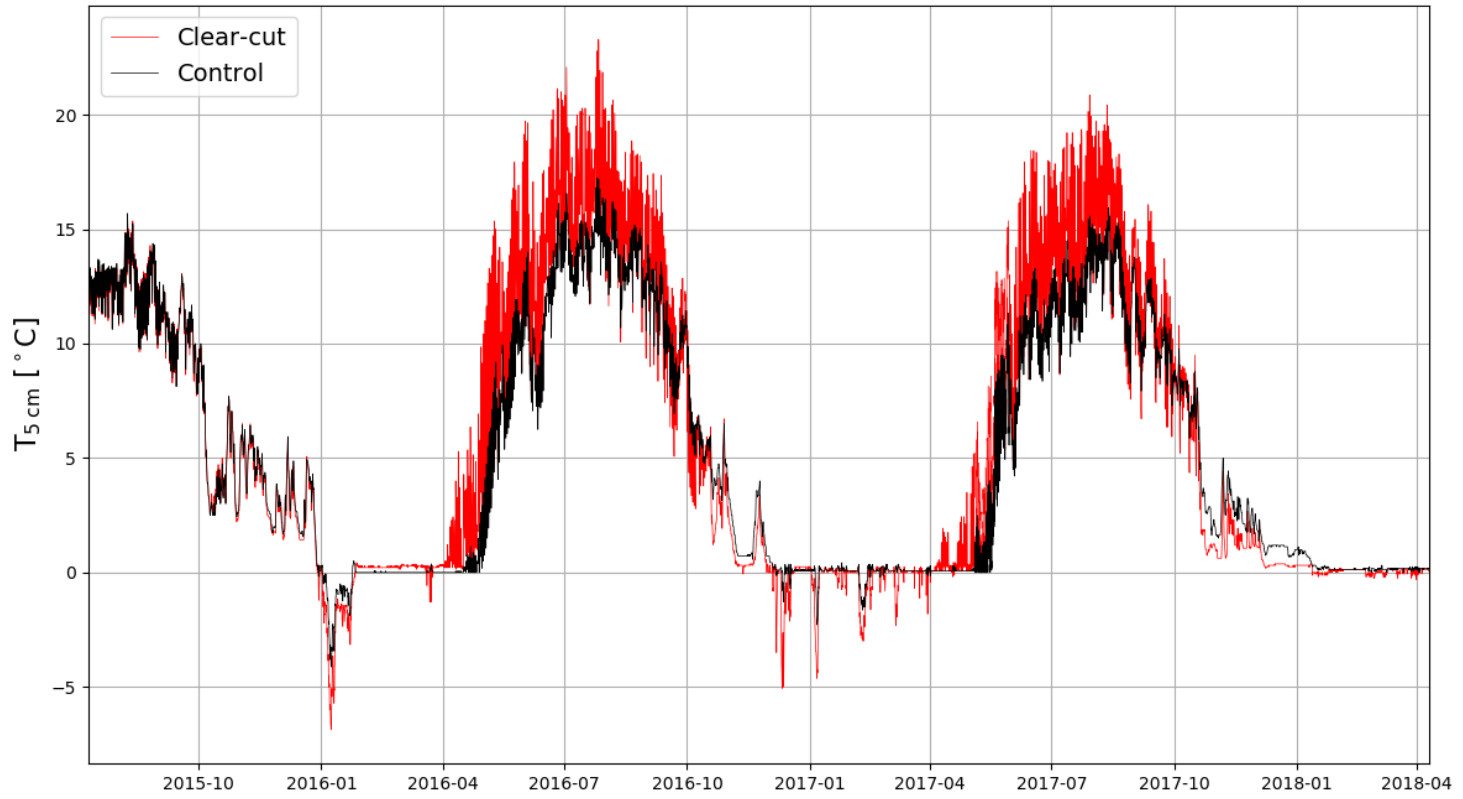

**Figure S4. Hourly mean soil temperatures at 5 cm depth measured at the clear-cut (red) and the control (black) treatments.**
